# Supplementary material for: Role of antihypertensive medicines in prostate cancer: a systematic review
Source: Springer Nature journal article supplement (doi:10.1186/s12885-024-12218-5), 2024-04-29
Supplement: MOESM2 [file 27034902]

# FUNNEL PLOT

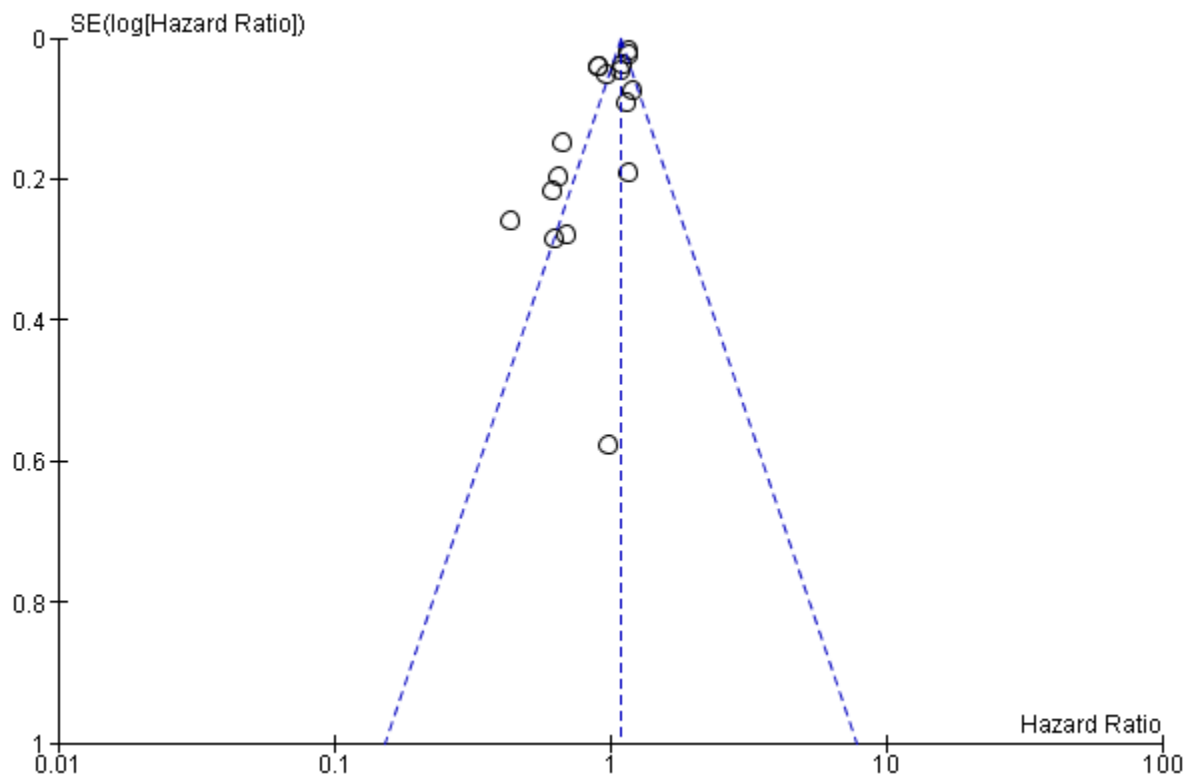

## Forest plot

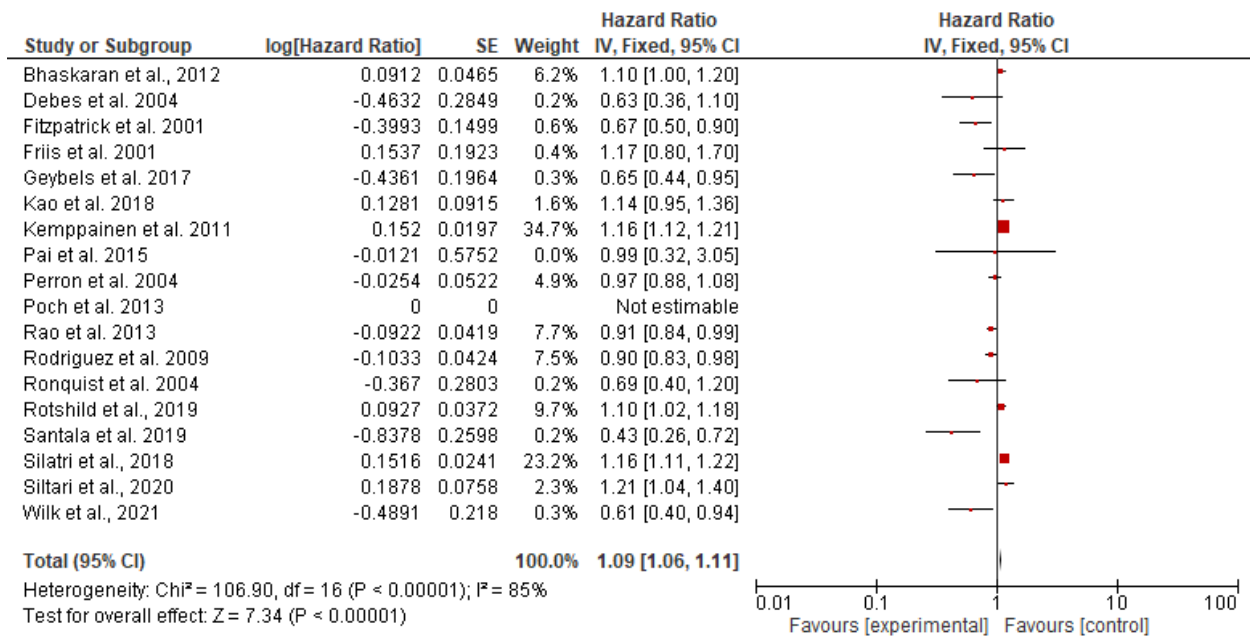

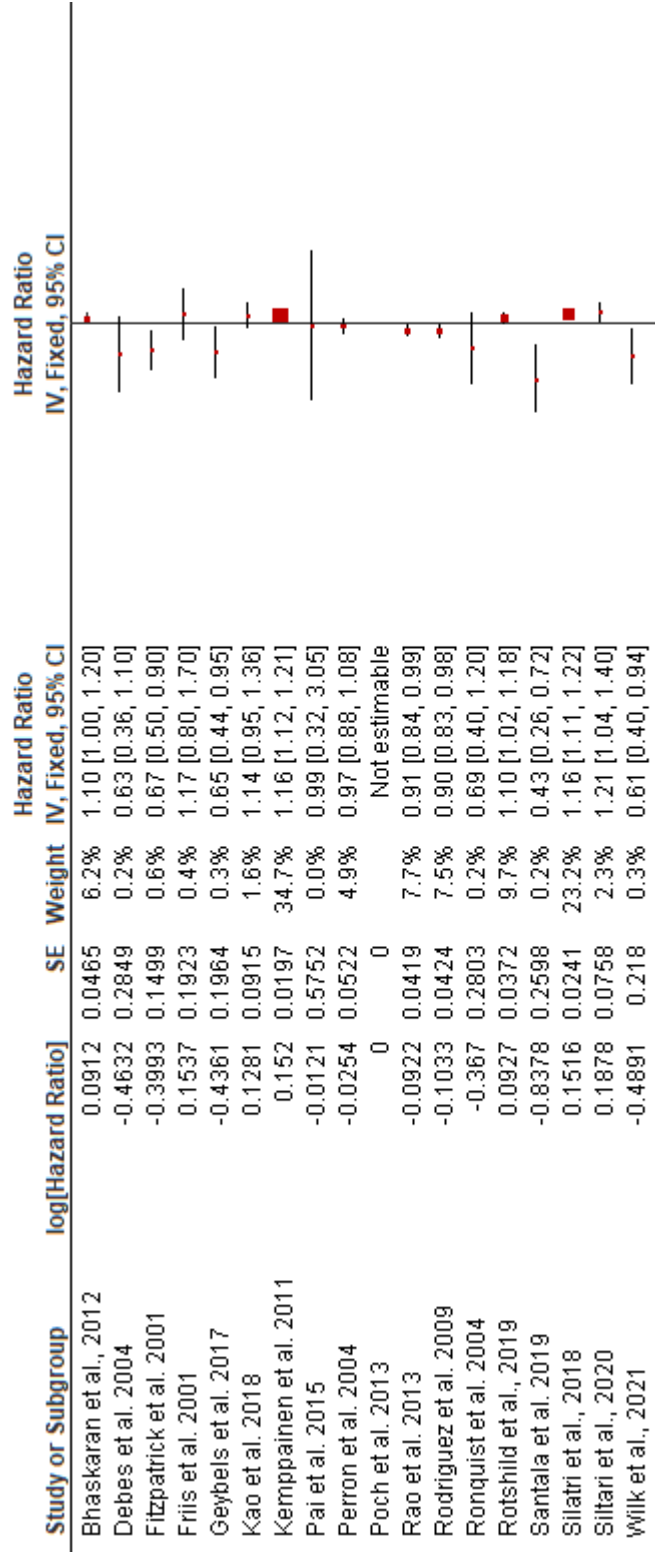

**Total (95% CI)** 100.0% **1.09 [1.06, 1.11]**

Heterogeneity: Chi<sup>2</sup> = 106.90, df = 16 (P < 0.00001); I<sup>2</sup> = 85%

Test for overall effect: Z = 7.34 (P < 0.00001)
